# Supplementary material for: Facile preparation of a Ni–imidazole compound with high activity for ethylene dimerization
Source: Royal Society of Chemistry journal article supplement (doi:10.1039/d3cc04794f), 2023-11-14
Supplement: d3cc04794f1.pdf [file d3cc04794f1.pdf]

## Supporting Information

### Facile Preparation of Ni-imidazole Compound with High Activity for Ethylene Dimerization

Zhaohui Liu,<sup>1</sup> Guanxing Li,<sup>2</sup> Mohammed R. Alalouni,<sup>3</sup> Ziyin Chen,<sup>4</sup> Xinglong Dong,<sup>5,\*</sup> Jianjian Wang,<sup>1</sup>  
Cailing Chen<sup>2,\*</sup>

<sup>1</sup> School of Chemistry and Chemical Engineering & Institute of Advanced Interdisciplinary Studies, Multi-scale Porous Materials Center, Chongqing University, Chongqing, 401331, China.

<sup>2</sup> Advanced Membranes and Porous Materials (AMPM) Center, Physical Sciences and Engineering Division, King Abdullah University of Science and Technology (KAUST), Thuwal 23955, Saudi Arabia

<sup>3</sup> Catalyst Center of Excellence (CCoE), Research and Development Center, Saudi Aramco, Dhahran 31311, Saudi Arabia

<sup>4</sup> Gas and Particulate Metrology Group, National Physical Laboratory, Teddington, London TW11 0LW, UK

<sup>5</sup> School of Chemistry, University of Lincoln, Brayford Pool, Lincoln, LN6 7TS, UK

\*Corresponding authors: [cailing.chen@kaust.edu.sa](mailto:cailing.chen@kaust.edu.sa) (Dr. C. Chen); [xinglong.dong.uk@gmail.com](mailto:xinglong.dong.uk@gmail.com) (Dr. X. Dong)

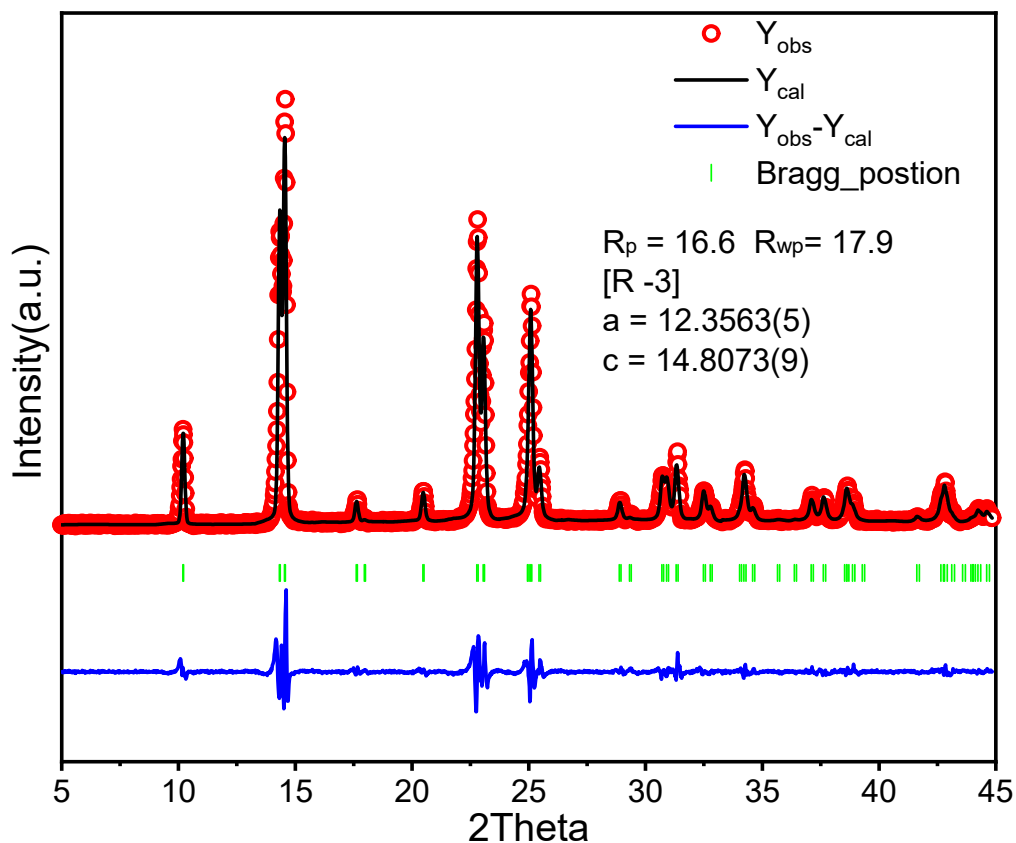

Fig. S1 XRD patterns of Ni-imidazole with the experimental profiles (dot line, red), Pawley refined profiles (solid black line), Bragg positions (green), and differences between experimental and refined PXRD patterns (blue).

Note: we performed an XRD Rietveld refinement for this sample and the fitting results was indexed to a trigonal R-3 space group with a unit cell of  $a=12.36 \text{ \AA}$ ,  $c = 14.81 \text{ \AA}$  ( $R_p=5.76\%$  and  $R_{wp}=7.95\%$ ), which perfectly matches the previously reported structure.

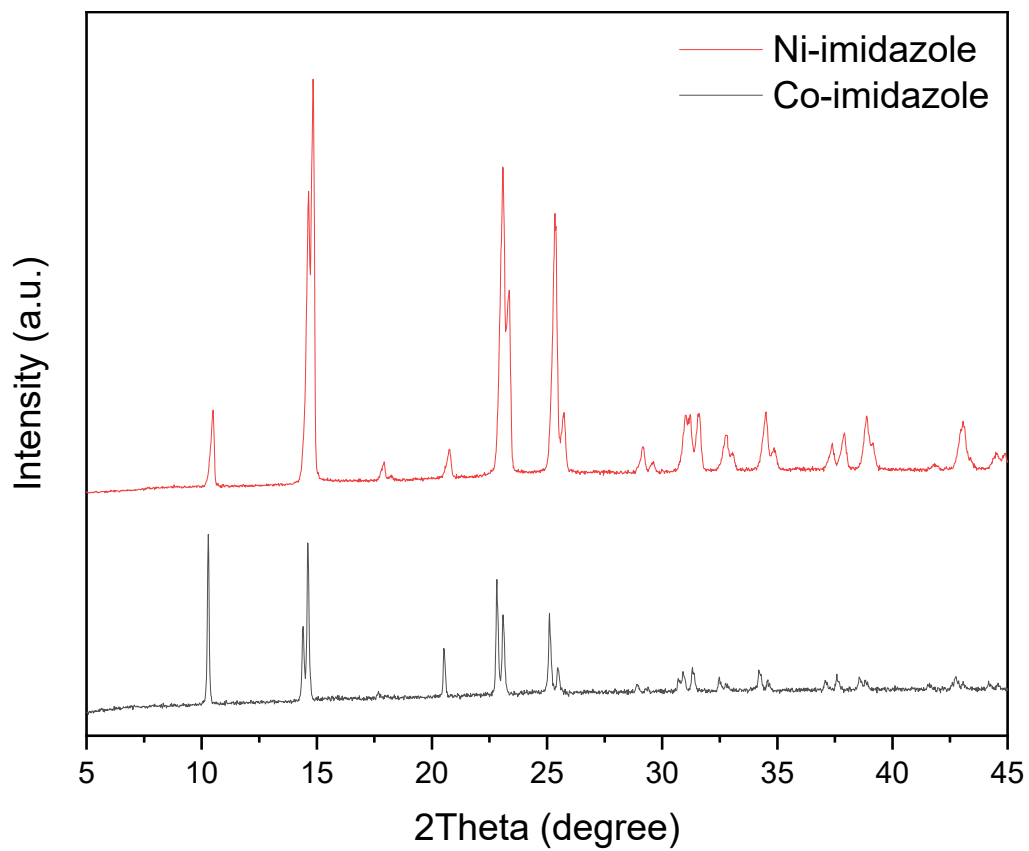

Fig. S2 XRD patterns of Ni-imidazole and Co-imidazole.

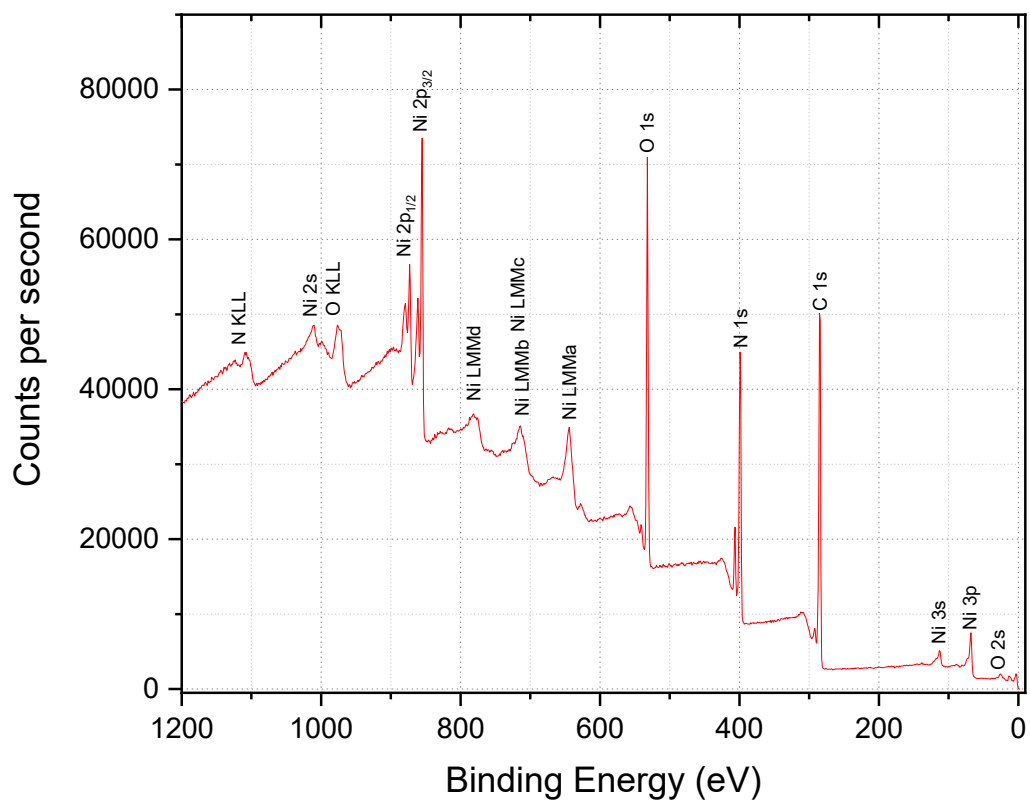

Fig. S3 XPS survey scan of Ni-imidazole.

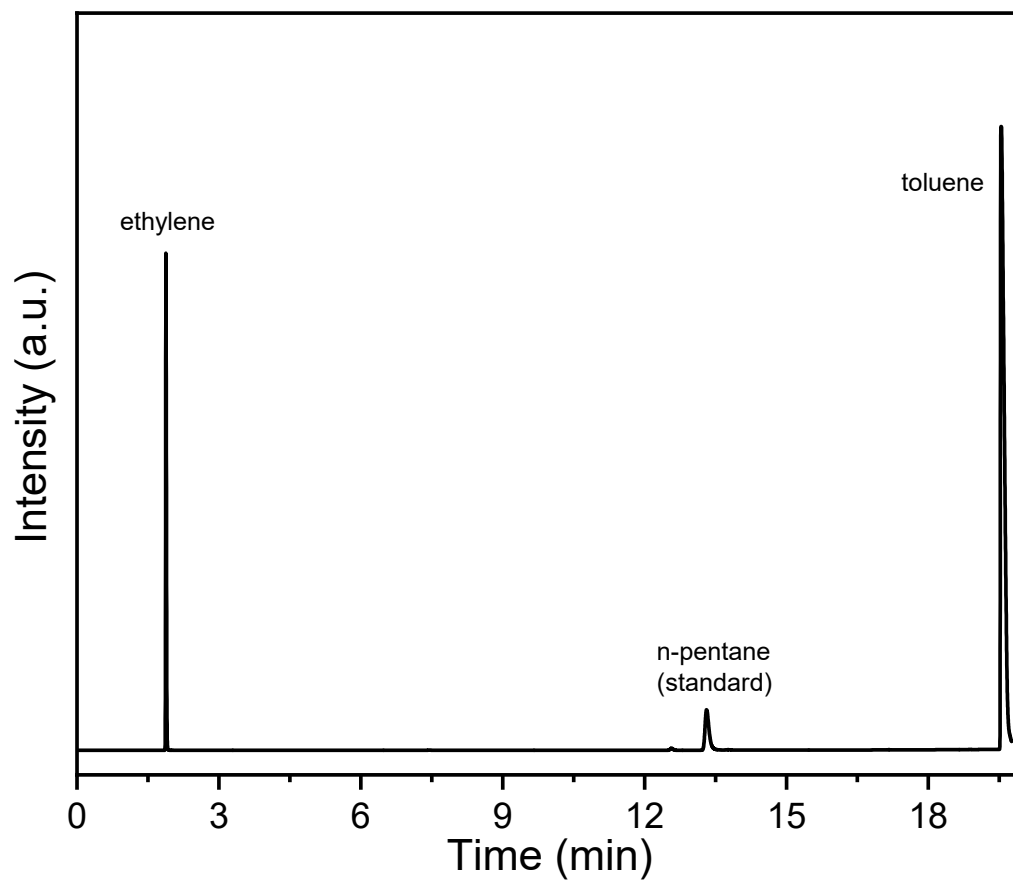

Fig. S4 Gas Chromatography record of blank test. Ethylene dimerization as feed gas, toluene as solvent, MAO as co-catalyst under 35 °C and 30 bar of ethylene. No butenes or hexenes were detected, suggesting that no catalytic performance without catalysts.

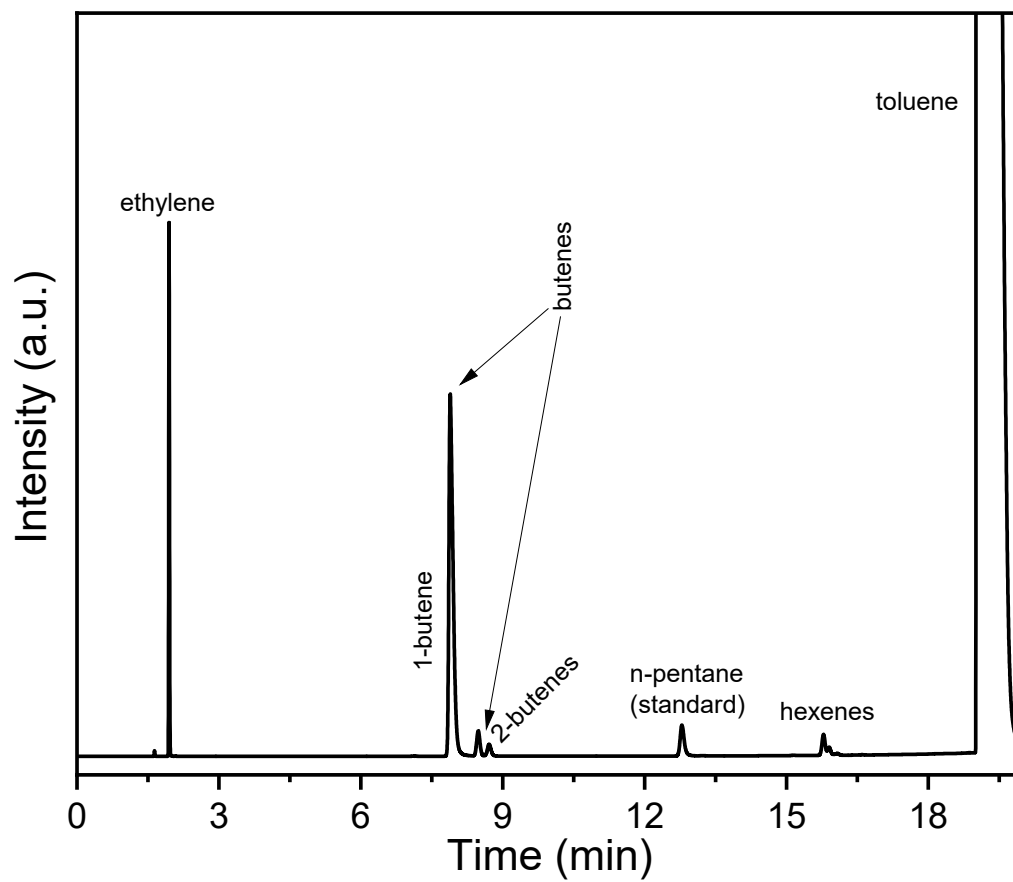

Fig. S5 Gas Chromatography record of ethylene dimerization over Ni-complex.

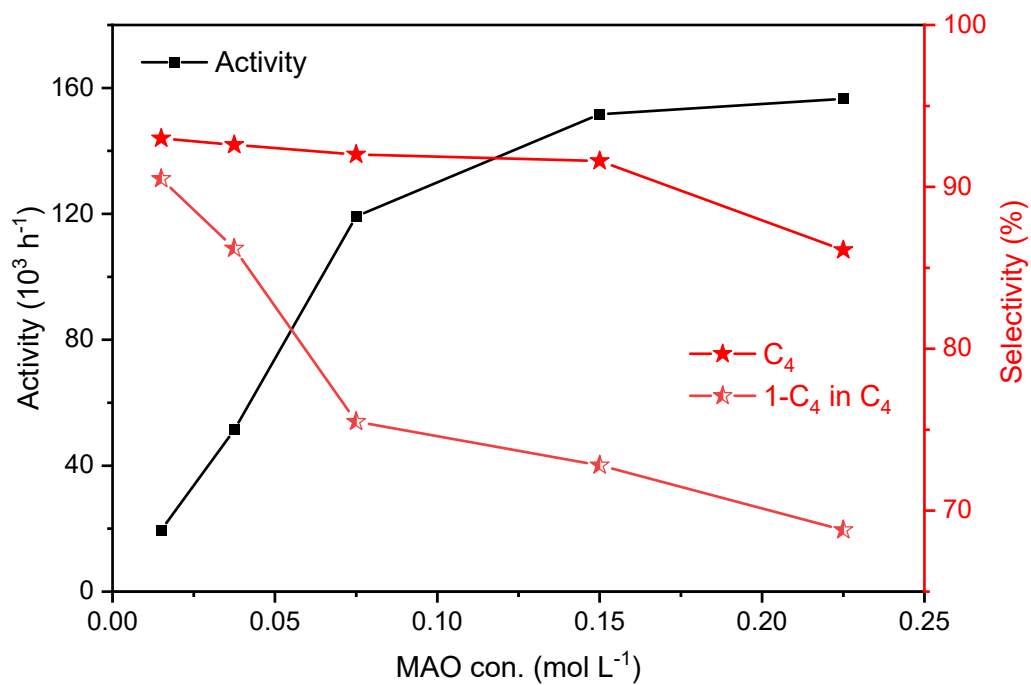

Fig. S6 MAO concentration dependent activity and selectivity of ethylene dimerization catalyzed by Ni-imidazole in the liquid phase

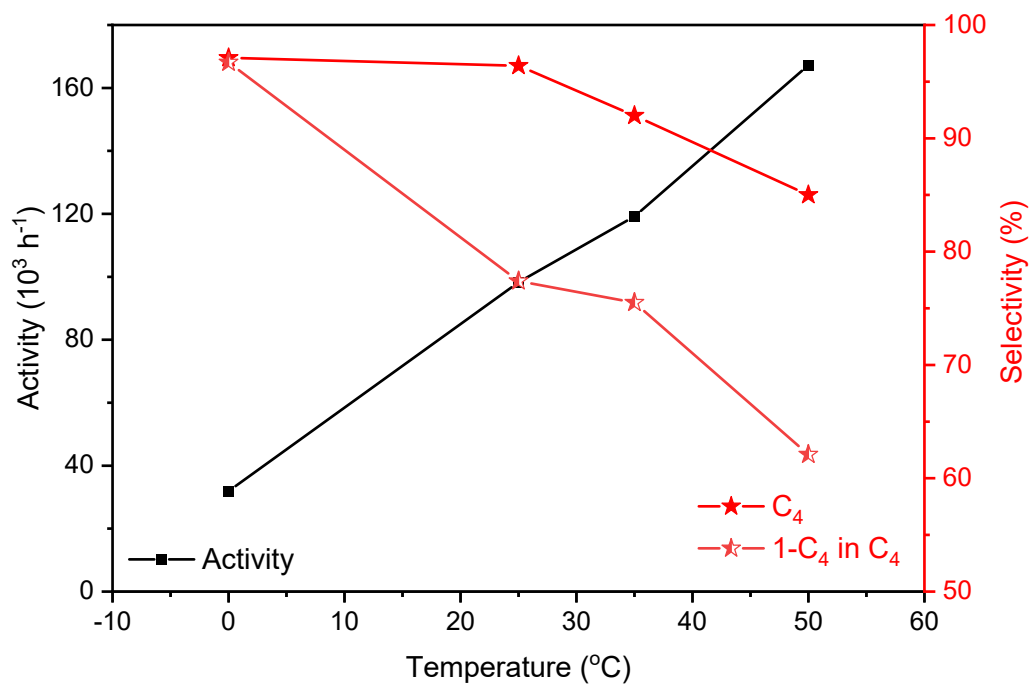

Fig. S7 Temperature dependent activity and selectivity of ethylene dimerization catalyzed by Ni-imidazole in the liquid phase



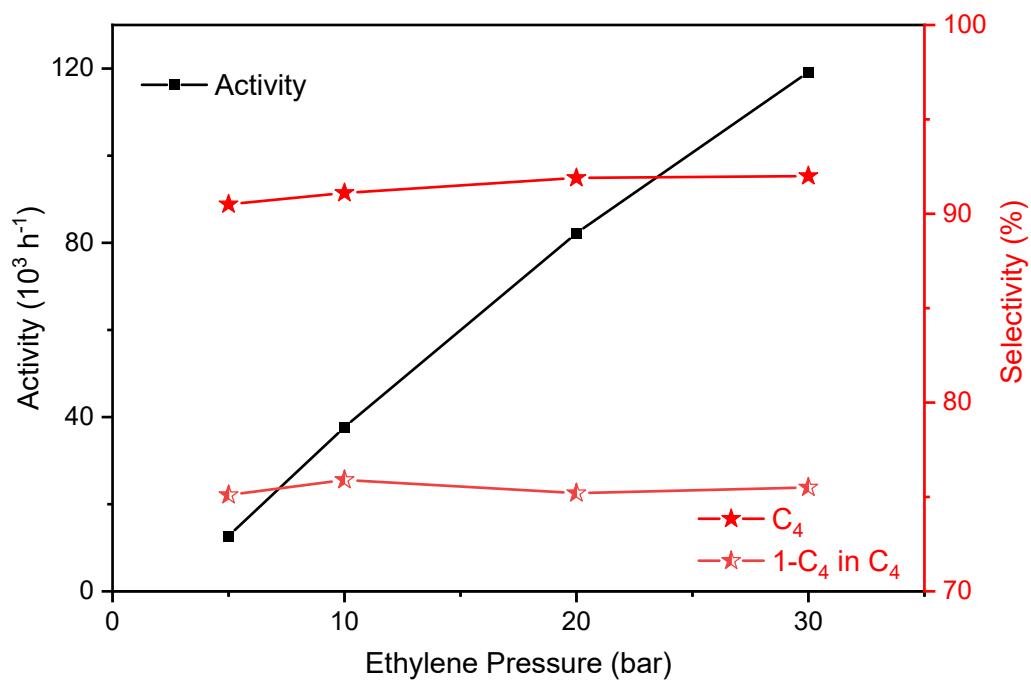

Fig. S8 Ethylene pressure dependent activity and selectivity of ethylene dimerization catalyzed by Ni-imidazole in the liquid phase

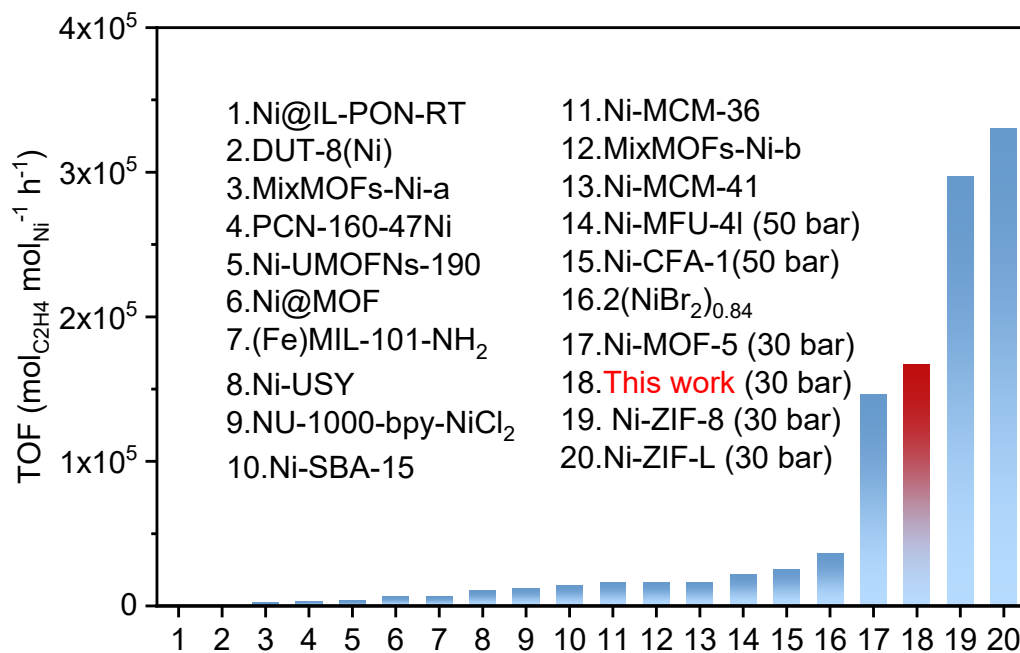

Fig. S9 Comparison of turnover frequency of various high-performance heterogeneous catalysts for ethylene dimerization.

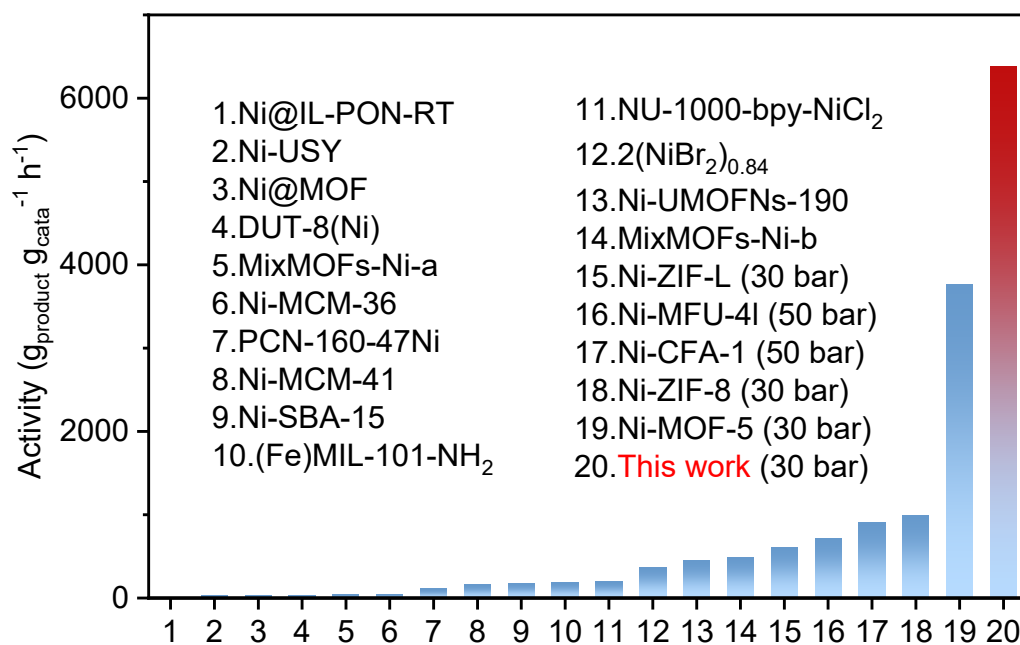

Fig. S10 Comparison of mass activity of various high-performance heterogeneous catalysts for ethylene dimerization.

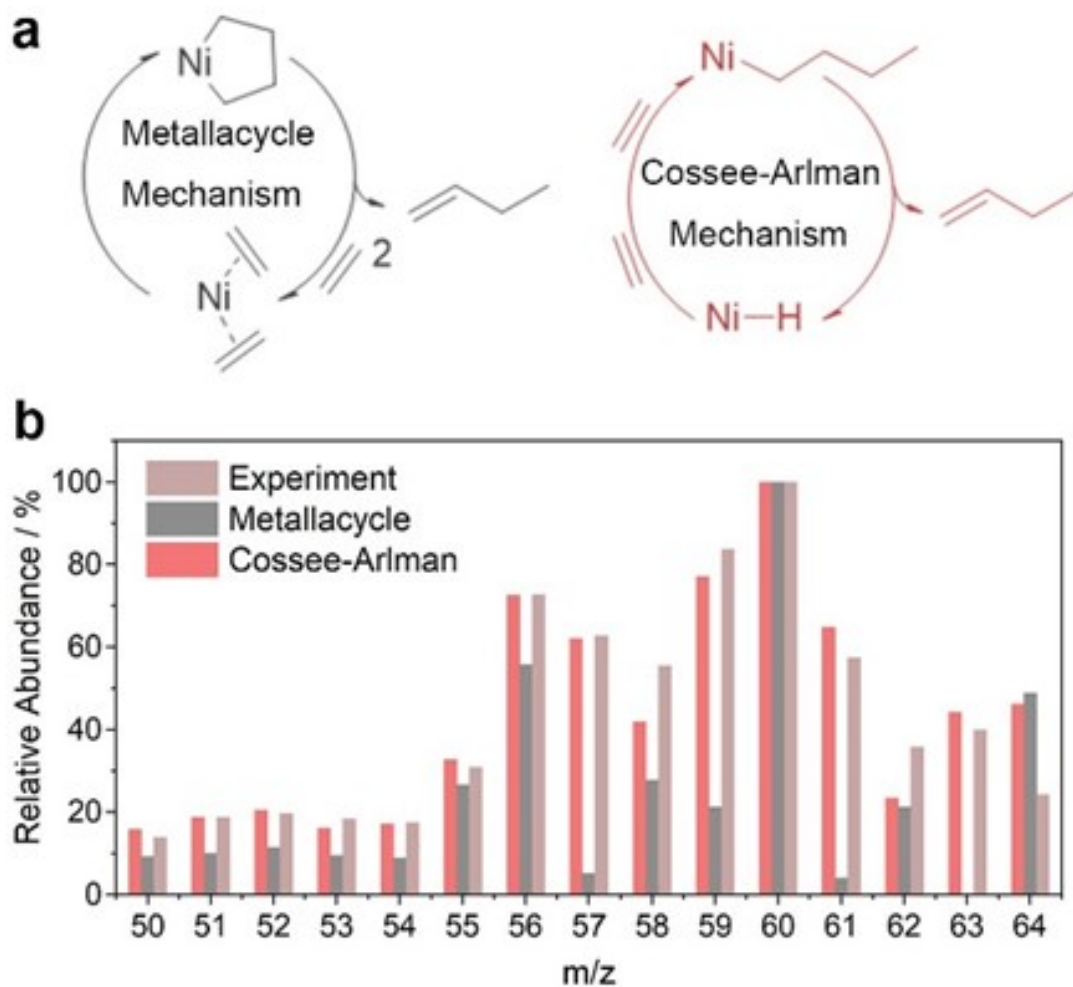

Fig. S11 (a) Two proposed catalytic ethylene dimerization mechanism. (b) The fragmentation patterns of 1-butene from a mixed 1:1 C<sub>2</sub>H<sub>4</sub>/C<sub>2</sub>D<sub>4</sub> gas, based on experimental results and predictions from the proposed mechanisms.

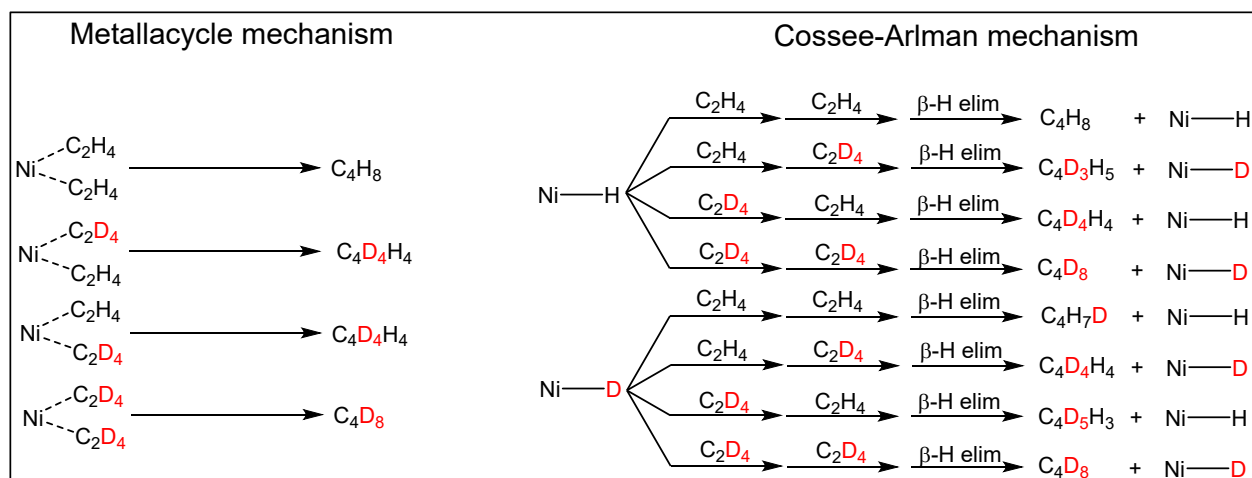

Fig. S12 Ethylene dimerization to butene isotopomers via the Metallacycle and Cossee-Arlman mechanisms.

Note: The metallacycle mechanism and Cossee-Arlman mechanism can be distinguished by designing an isotope labeling experiment, that is, ethylene dimerization experiments using a 1:1 mixture of ethylene ( $\text{C}_2\text{H}_4$ ) and perdeutero ethylene ( $\text{C}_2\text{D}_4$ ) as the feed gas. Theoretically, isotope labeling experiment results should be in a 1:2:1 ratio of  $\text{C}_4\text{H}_8$ ,  $\text{C}_4\text{H}_4\text{D}_4$  and  $\text{C}_4\text{D}_8$  if the reaction proceeds according to the metallacycle mechanism, whereas the result should be in a 1:1:1:2:1:1:1:1 ratio of  $\text{C}_4\text{H}_8$ ,  $\text{C}_4\text{H}_7\text{D}$ ,  $\text{C}_4\text{H}_5\text{D}_3$ ,  $\text{C}_4\text{H}_4\text{D}_4$ ,  $\text{C}_4\text{H}_3\text{D}_5$ ,  $\text{C}_4\text{HD}_7$ , and  $\text{C}_4\text{D}_8$  if the reaction proceeds according to the Cossee-Arlman mechanism. Isotope products can be distinguished by analyzing their fragmentation peaks using mass spectrometry (Fig. S11).
